# Supplementary material
Source: HighWire-hosted journal article supplement (http://gut.bmj.com/highwire/filestream/193032/field_highwire_adjunct_files/4/Tsilingiri_et._al._Sup._Fig._4.pdf)
Supplement: Tsilingiri_et._al._Sup._Fig._4.pdf [file Tsilingiri_et._al._Sup._Fig._4.pdf]

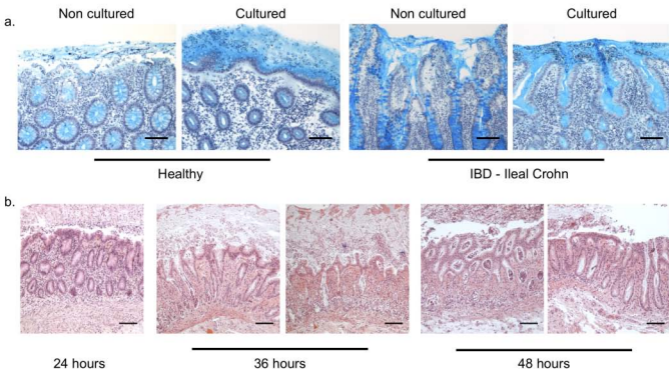

Suppl. Fig. 4. The mucus layer as well as tissue integrity is preserved for more than 24 hours if medium is taken off the cylinder after the first 2 h of stimulation.

a. Healthy or CD tissue were cultured for 2 h in a humidified 5% CO<sub>2</sub> atmosphere in the presence of 200μL of medium inside the cylinder and for another 22 h in a saturated 99% O<sub>2</sub> atmosphere after removal of the medium. Mucus is stained with Alcian blue pas.

b. Healthy tissue was cultured for the indicated time points. All scale bars are 200μm.
